# Supplementary material for: Characterization of CD4+ T Cell Subsets in Patients with Abdominal Aortic Aneurysms
Source: Hindawi journal article supplement (doi:10.1155/2018/6967310), 2018-12-27
Supplement: f1 [file 6967310.f1.pdf]

**Supplementary Table 1.** Antibodies for Immunohistochemistry

| Protein name | Antibody catalogue number | Vendor     | Species               | Usage Concentration |
|--------------|---------------------------|------------|-----------------------|---------------------|
| CD3          | A0452                     | Dako       | Rabbit polyclonal     | 1.2 µg/mL           |
| CD8          | M7103                     | Dako       | Mouse IgG1 monoclonal | 2 µg/mL             |
| IL-17        | sc7927                    | Santa Cruz | Rabbit polyclonal     | 0.8 µg/mL           |
| IL-22        | ab134035                  | Abcam      | Mouse IgG1 monoclonal | 5 µg/mL             |
| IL-4         | 500702                    | Biolegend  | Mouse IgG1 monoclonal | 5 µg/mL             |
| IL-23        | 511202                    | Biolegend  | Mouse IgG1 monoclonal | 2.5 µg/mL           |

**Supplementary Table 2.** Antibodies for flow cytometry

| Protein name | Fluorochrome | Antibody catalogue number | Vendor        | Species                | Usage volume for [1x10 <sup>7</sup> cells/mL] |
|--------------|--------------|---------------------------|---------------|------------------------|-----------------------------------------------|
| CD3          | FITC         | MHCD0301                  | Caltag        | Mouse IgG2a monoclonal | 1 µL                                          |
| CD3          | PE           | MHCD0304                  | Caltag        | Mouse IgG2a monoclonal | 1 µL                                          |
| CD3          | PerCP        | 300326                    | Biolegend     | Mouse IgG2a monoclonal | 1 µL                                          |
| CD8          | FITC         | 555634                    | BD Bioscience | Mouse IgG1 monoclonal  | 4 µL                                          |
| CD8          | APC          | 300912                    | Biolegend     | Mouse IgG1 monoclonal  | 2 µL                                          |
| CCR5         | FITC         | 555992                    | BD Bioscience | Mouse IgG2a monoclonal | 4 µL                                          |
| CCR6         | PE           | 353410                    | Biolegend     | Mouse IgG2b monoclonal | 1 µL                                          |
| CXCR3        | PE           | 557185                    | BD Bioscience | Mouse IgG1 monoclonal  | 4 µL                                          |
| CCR4         | PerCP/Cy5.5  | 359406                    | Biolegend     | Mouse IgG1 monoclonal  | 1 µL                                          |
| IFN-γ        | FITC         | 300449                    | BD Bioscience | Mouse IgG2b monoclonal | 2 µL                                          |
| TNF-α        | PE           | 559321                    | BD Bioscience | Mouse IgG1 monoclonal  | 4 µL                                          |
| IL-4         | APC          | 500714                    | Biolegend     | Mouse IgG1 monoclonal  | 2 µL                                          |
| IL-17        | PE           | 12717942                  | e-Bioscience  | Mouse IgG1 monoclonal  | 1.5 µL                                        |
| IL-22        | eFluor660    | 50722942                  | e-Bioscience  | Mouse IgG1 monoclonal  | 1 µL                                          |
